# Supplementary material
Source: PubMed Central journal article supplement (PMC9397616)

Figure S7

A.

Unirradiated area

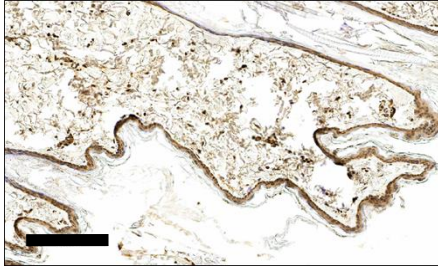

Standard irradiated area

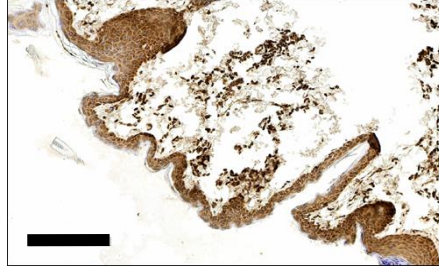

Unirradiated area

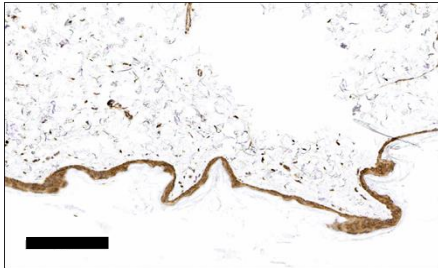

FLASH irradiated area

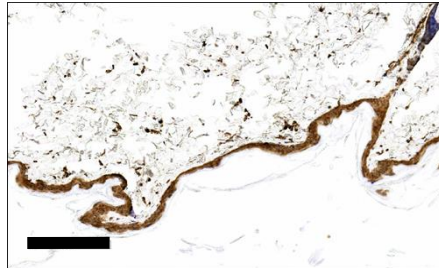

B.

Unirradiated area

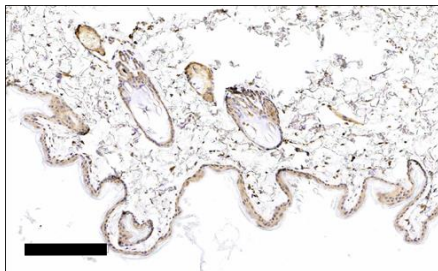

Standard irradiated area

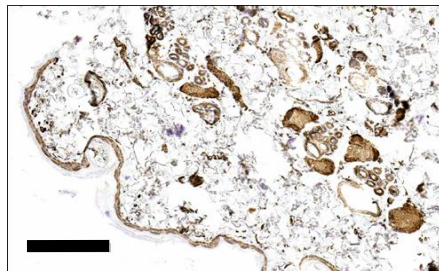

Unirradiated area

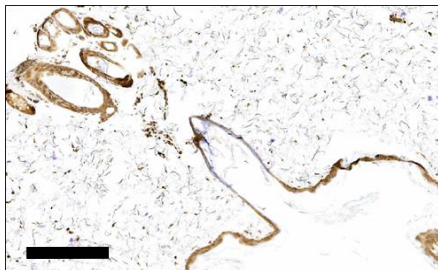

FLASH irradiated area

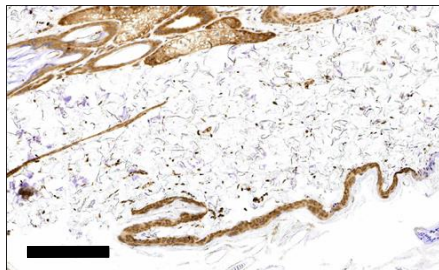

Supplement: can-21-1500_figure_sf7_suppsf7.pdf [file can-21-1500_figure_sf7_suppsf7.pdf]
