# Supplementary material
Source: PubMed Central journal article supplement (PMC9397616)
Supplement: can-21-1500_table_st1_suppst1.pdf [file can-21-1500_table_st1_suppst1.pdf]

Table S1

| Gene name       | FDR         | Standard PRT mean | Control mean | Real Fold change |
|-----------------|-------------|-------------------|--------------|------------------|
| <b>Aen</b>      | 0           | 1205.718049       | 539.8979691  | 2.233233162      |
| <b>Apaf1</b>    | 0           | 918.8229606       | 323.4427673  | 2.840759026      |
| <b>Bax</b>      | 2.12896E-10 | 343.7287263       | 153.466277   | 2.239767152      |
| <b>Bbc3</b>     | 0.001581104 | 173.5383234       | 70.7598678   | 2.452496433      |
| <b>Bbs7</b>     | 4.09449E-05 | 113.3714517       | 69.44985558  | 1.632421705      |
| <b>Ccn2</b>     | 4.34638E-05 | 1372.656158       | 808.1477551  | 1.698521278      |
| <b>Cdkn1a</b>   | 0.006867976 | 5944.193612       | 3192.508113  | 1.861919657      |
| <b>Col2a1</b>   | 5.43015E-08 | 28.07335255       | 2.899146881  | 9.683315021      |
| <b>Ddias</b>    | 9.64788E-08 | 327.5865965       | 107.8297562  | 3.037998117      |
| <b>Ddit4</b>    | 0.014352182 | 743.5018213       | 329.7354615  | 2.254843376      |
| <b>Dhh</b>      | 8.88178E-16 | 102.3545165       | 23.95364317  | 4.273025016      |
| <b>Dzip1</b>    | 1.63014E-12 | 639.6992087       | 289.3590729  | 2.210745294      |
| <b>Eda2r</b>    | 0           | 593.8041628       | 169.2391578  | 3.508668859      |
| <b>Evc</b>      | 2.33267E-05 | 336.9101004       | 194.7460045  | 1.729997498      |
| <b>Fas</b>      | 8.6435E-05  | 168.8405184       | 95.41878276  | 1.769468375      |
| <b>Fgb</b>      | 0.014631054 | 53.65176948       | 25.4537248   | 2.107816043      |
| <b>Fgf9</b>     | 3.03479E-11 | 47.58210639       | 5.860400078  | 8.119259053      |
| <b>Glis2</b>    | 1.46576E-09 | 452.1717179       | 248.1350706  | 1.82228057       |
| <b>Gm11555</b>  | 0           | 51.68653732       | 0            | 516.86           |
| <b>Ift27</b>    | 2.58795E-05 | 193.2803753       | 106.2342851  | 1.819378511      |
| <b>Inhba</b>    | 0.007491032 | 172.5096749       | 89.28989213  | 1.932017957      |
| <b>Kitl</b>     | 7.99361E-15 | 1270.980464       | 665.7445383  | 1.909111365      |
| <b>Krt25</b>    | 0.010393704 | 1090.041041       | 48.92790576  | 22.27851415      |
| <b>Krt26</b>    | 7.45413E-05 | 159.202668        | 2.360368383  | 67.44822935      |
| <b>Krt31</b>    | 0.000133942 | 113.8558887       | 2.00222499   | 56.8646827       |
| <b>Krt33a</b>   | 2.37812E-06 | 298.0021771       | 2.016160596  | 147.8067659      |
| <b>Krt7</b>     | 6.14651E-09 | 190.0591258       | 10.8965579   | 17.44212508      |
| <b>Krt71</b>    | 0.002823596 | 1859.386797       | 59.257818    | 31.37791534      |
| <b>Krt72</b>    | 5.91736E-06 | 248.7666116       | 1.905557815  | 130.5479213      |
| <b>Krt73</b>    | 0.036442417 | 269.5047977       | 19.20666581  | 14.03183667      |
| <b>Krt83</b>    | 4.6037E-06  | 110.511247        | 0.523023052  | 211.2932625      |
| <b>Krt87</b>    | 0.000191072 | 180.1036238       | 3.746783165  | 48.06886759      |
| <b>Krtap1-4</b> | 0           | 68.0840349        | 0            | 680.84           |
| <b>Lrrk2</b>    | 2.17984E-09 | 641.4243665       | 352.5105791  | 1.819588984      |
| <b>Mdm2</b>     | 0           | 1863.068461       | 1170.638207  | 1.591498081      |
| <b>Pmaip1</b>   | 0.039702434 | 343.689825        | 106.1303859  | 3.238373461      |
| <b>Pml</b>      | 5.61796E-06 | 999.0031212       | 551.5715683  | 1.811194011      |
| <b>Pthlh</b>    | 0.000366106 | 140.3448965       | 67.20163602  | 2.088414879      |
| <b>Serpine2</b> | 0           | 1242.373106       | 174.16449    | 7.133331862      |
| <b>Siva1</b>    | 0.029517352 | 222.0609236       | 140.6994717  | 1.578264089      |
| <b>Tctn1</b>    | 1.72085E-14 | 327.0563183       | 177.0075289  | 1.847697216      |
| <b>Timp3</b>    | 0           | 8103.736126       | 4374.689657  | 1.852413945      |

**Table S1**

| <b>Gene name</b> | <b>FDR</b>  | <b>Standard PRT mean</b> | <b>Control mean</b> | <b>Real Fold change</b> |
|------------------|-------------|--------------------------|---------------------|-------------------------|
| <b>Tnfrsf10b</b> | 6.91905E-05 | 515.7209544              | 175.8362841         | 2.932960948             |
| <b>Wdr35</b>     | 0.005720915 | 365.8876317              | 177.1069067         | 2.065913965             |
| <b>Wnt9a</b>     | 0.002241934 | 63.88524531              | 30.21865554         | 2.114099525             |
