# Supplementary material
Source: PubMed Central journal article supplement (PMC9397616)
Supplement: can-21-1500_table_st2_suppst2.pdf [file can-21-1500_table_st2_suppst2.pdf]

Table S2

| Gene name | FDR         | Standard PRT mean | Control mean | Real Fold change |
|-----------|-------------|-------------------|--------------|------------------|
| Acan      | 0.000314715 | 2481.181852       | 987.3104786  | 2.513071527      |
| Ankrd13b  | 0.01072063  | 210.2378261       | 125.6467183  | 1.67324566       |
| Antxr1    | 1.82521E-12 | 2031.369607       | 1051.561209  | 1.931765445      |
| Ar        | 0           | 635.5931252       | 386.0156253  | 1.646547661      |
| Arhgap28  | 6.32128E-12 | 140.467443        | 76.90589326  | 1.826484773      |
| Arpin     | 0.007928823 | 118.4938633       | 65.2839379   | 1.815053858      |
| Bag3      | 0.000214972 | 660.9661755       | 349.9252349  | 1.888878279      |
| Baiap2    | 1.25806E-05 | 239.2073929       | 158.1308417  | 1.512718141      |
| Bmp4      | 2.34076E-05 | 246.7275883       | 114.1272263  | 2.161864407      |
| Camsap3   | 0.017567176 | 78.6834555        | 46.53452322  | 1.690861968      |
| Castor1   | 8.04043E-08 | 77.64657706       | 32.8454483   | 2.36399809       |
| Castor2   | 1.53507E-05 | 346.6566388       | 203.3902374  | 1.704391731      |
| Cav1      | 0.000875849 | 1248.96044        | 639.6663236  | 1.952518671      |
| Ccn2      | 0           | 2094.196053       | 860.6626503  | 2.433236823      |
| Cd81      | 0.018403936 | 3570.904713       | 2250.203976  | 1.586924897      |
| Cdh5      | 0.001311312 | 1889.292406       | 958.998642   | 1.970067864      |
| Cdo1      | 1.87083E-08 | 536.2867181       | 314.0471038  | 1.707663315      |
| Cgnl1     | 0.004917426 | 428.9957145       | 275.264088   | 1.558487769      |
| Chadl     | 5.25415E-06 | 161.9477952       | 56.69958782  | 2.856242901      |
| Clip3     | 8.34E-13    | 190.8976889       | 85.21506422  | 2.240187116      |
| Cobl      | 0.016072487 | 85.62361517       | 56.75601181  | 1.508626354      |
| Col12a1   | 0.000528149 | 8112.580064       | 4223.676992  | 1.92073875       |
| Col18a1   | 0           | 344.7926801       | 145.5449608  | 2.368977106      |
| Col1a1    | 1.43219E-14 | 368236.8701       | 198360.2196  | 1.856404832      |
| Col1a2    | 1.31281E-08 | 146372.9382       | 82860.52021  | 1.766497939      |
| Col2a1    | 0.000256677 | 13159.86646       | 5797.525777  | 2.269910814      |
| Col4a1    | 0           | 3973.287959       | 1518.5139    | 2.616563443      |
| Col4a2    | 1.44329E-15 | 2436.897632       | 973.8537536  | 2.502324013      |
| Col5a1    | 2.54422E-05 | 4832.982913       | 3000.930872  | 1.610494583      |
| Col5a2    | 0.000163713 | 8761.93459        | 5546.506703  | 1.579721266      |
| Col5a2    | 0.000163713 | 8761.93459        | 5546.506703  | 1.579721266      |
| Col6a1    | 3.99791E-13 | 3482.075192       | 1952.153001  | 1.783710186      |
| Col6a1    | 3.99791E-13 | 3482.075192       | 1952.153001  | 1.783710186      |
| Col8a1    | 4.45491E-10 | 3878.648307       | 748.1178011  | 5.184542195      |
| Comp      | 0.00237703  | 2502.46979        | 1336.365725  | 1.872593515      |
| Coro2b    | 0.012057552 | 168.4243778       | 106.4434898  | 1.582289138      |
| Cpeb1     | 0.013082164 | 136.4565114       | 81.19942976  | 1.680510711      |
| Cryab     | 0.024411807 | 772.6107744       | 339.619054   | 2.274933533      |
| Cxcl10    | 1.85468E-11 | 164.4371719       | 32.3348908   | 5.085440769      |
| Dact1     | 9.2585E-08  | 141.6451336       | 76.32994266  | 1.855695532      |
| Dcstamp   | 2.30761E-06 | 217.9600611       | 103.3185328  | 2.109593072      |
| Dlc1      | 2.19064E-07 | 1716.448325       | 973.3364438  | 1.763468671      |
| Dpysl3    | 0           | 2698.771816       | 1267.841357  | 2.128635259      |

Table S2

| Gene name      | FDR         | Standard PRT mean | Control mean | Real Fold change |
|----------------|-------------|-------------------|--------------|------------------|
| <b>Ecm1</b>    | 1.69531E-13 | 969.7174554       | 497.935229   | 1.947477099      |
| <b>Edn1</b>    | 2.31276E-07 | 21.82290757       | 5.331992399  | 4.092824209      |
| <b>Eomes</b>   | 5.68169E-06 | 105.9511498       | 41.50209253  | 2.552911031      |
| <b>Epha2</b>   | 0.001987782 | 419.8578731       | 273.4640491  | 1.53533115       |
| <b>Ext1</b>    | 2.80127E-06 | 1176.910311       | 746.9024413  | 1.575721602      |
| <b>Fam107a</b> | 3.52614E-06 | 24.68411923       | 7.893125466  | 3.127293407      |
| <b>Fap</b>     | 0.007290291 | 2379.219769       | 1400.737864  | 1.69854748       |
| <b>Fgf13</b>   | 5.22249E-13 | 111.3565596       | 54.27944     | 2.05154216       |
| <b>Foxc1</b>   | 7.82707E-14 | 665.4926585       | 409.1267025  | 1.626617511      |
| <b>Foxp3</b>   | 0.000286935 | 68.5051881        | 29.87889357  | 2.292761877      |
| <b>Fstl4</b>   | 0.000726896 | 33.08170863       | 9.483108533  | 3.488487822      |
| <b>Gdf3</b>    | 2.52289E-09 | 128.3153556       | 68.93630576  | 1.861361066      |
| <b>Gli2</b>    | 2.94209E-14 | 198.7215648       | 106.8253129  | 1.860247907      |
| <b>Hspa1a</b>  | 0.006325736 | 50.84282096       | 27.89028145  | 1.822958332      |
| <b>Hyal1</b>   | 2.03282E-13 | 453.9562555       | 272.2110521  | 1.667662838      |
| <b>Icam1</b>   | 0           | 549.5501773       | 234.4602472  | 2.343894899      |
| <b>Id3</b>     | 0           | 540.1586435       | 307.75535    | 1.755155982      |
| <b>Igf1</b>    | 5.10703E-15 | 2464.339704       | 1335.012146  | 1.845930549      |
| <b>Inpp1</b>   | 0.004787935 | 783.6349024       | 467.630709   | 1.675755863      |
| <b>Itgav</b>   | 1.68867E-05 | 3481.835811       | 2160.228651  | 1.611790404      |
| <b>Itm2c</b>   | 0.000977084 | 1502.4837         | 891.9888611  | 1.684419801      |
| <b>Jam3</b>    | 0.029948535 | 115.3749522       | 74.76579894  | 1.543151465      |
| <b>Kank1</b>   | 0.00778289  | 546.0541296       | 339.3811677  | 1.608970036      |
| <b>Kank1</b>   | 0.00778289  | 546.0541296       | 339.3811677  | 1.608970036      |
| <b>Kremen1</b> | 0.001685465 | 502.9742017       | 334.7430253  | 1.50256813       |
| <b>Lamb1</b>   | 5.63968E-11 | 739.9893738       | 351.8607182  | 2.103074699      |
| <b>Lif</b>     | 0.002023187 | 69.42083983       | 30.49896456  | 2.276170383      |
| <b>Lmod2</b>   | 0.005953171 | 202.6530089       | 79.94154142  | 2.535015028      |
| <b>Lpar1</b>   | 0.000408565 | 528.0560443       | 295.6011596  | 1.786380151      |
| <b>Lrp1</b>    | 4.17444E-14 | 16513.42178       | 8510.542186  | 1.940348971      |
| <b>Lrp11</b>   | 2.70914E-06 | 58.71978003       | 29.64046463  | 1.981068137      |
| <b>Map1b</b>   | 1.4766E-14  | 865.7997817       | 518.3427391  | 1.670322966      |
| <b>Mapt</b>    | 0.012387221 | 71.39517775       | 43.9347726   | 1.625026682      |
| <b>Matn1</b>   | 0.012059148 | 18.59775527       | 7.378075958  | 2.520678206      |
| <b>Milt6</b>   | 5.95328E-07 | 1512.018581       | 928.950685   | 1.627662916      |
| <b>Mmp14</b>   | 3.15376E-07 | 2875.887895       | 1687.325001  | 1.704406615      |
| <b>Mmp15</b>   | 7.41192E-07 | 107.9800124       | 44.91094308  | 2.404314071      |
| <b>Mmp2</b>    | 0           | 5791.280708       | 1828.657839  | 3.16695698       |
| <b>Mthfr</b>   | 1.98773E-07 | 555.5345843       | 340.4808238  | 1.631617834      |
| <b>Nab2</b>    | 0.002119158 | 216.0093727       | 136.9797805  | 1.576943487      |
| <b>Nrp1</b>    | 3.03091E-14 | 1540.693307       | 820.307951   | 1.878188923      |
| <b>Nupr1</b>   | 1.22607E-07 | 241.4359313       | 141.8788531  | 1.701704842      |
| <b>Ocstamp</b> | 1.35321E-10 | 261.4845432       | 96.24820342  | 2.716773237      |

Table S2

| Gene name | FDR         | Standard PRT mean | Control mean | Real Fold change |
|-----------|-------------|-------------------|--------------|------------------|
| Osr1      | 0.007235615 | 45.0456988        | 25.54191972  | 1.763598794      |
| Pdgfc     | 4.88498E-15 | 482.9133814       | 255.0480052  | 1.893421519      |
| Phldb2    | 0           | 632.7264925       | 264.7064625  | 2.390294844      |
| Pkd2      | 0.000539791 | 778.1619409       | 487.9540783  | 1.594744209      |
| Plekhh2   | 0           | 626.1450269       | 287.7464345  | 2.176030532      |
| Plk2      | 1.13442E-08 | 190.0657019       | 105.7904313  | 1.7966247        |
| Pmepa1    | 7.60567E-07 | 747.9187773       | 420.1664334  | 1.780053612      |
| Pmp22     | 0           | 545.2532632       | 294.9674848  | 1.848519892      |
| Prag1     | 5.9508E-14  | 331.3326004       | 154.757433   | 2.140980203      |
| Prkd1     | 0.017928935 | 55.96858606       | 33.44243687  | 1.673579778      |
| Ptprg     | 2.1622E-06  | 820.9164751       | 517.3660025  | 1.586722883      |
| Rapgef3   | 0.000237289 | 251.6346797       | 150.9960072  | 1.666498898      |
| Rgma      | 0.000166605 | 196.6059961       | 92.83489383  | 2.117802778      |
| Rtn4rl1   | 1.27969E-07 | 418.3354481       | 188.7662709  | 2.216155705      |
| S1pr1     | 0.031993149 | 1222.889901       | 811.8446703  | 1.506310192      |
| Scamp5    | 0.004677358 | 319.2623531       | 200.2099203  | 1.594638031      |
| Schip1    | 0.02326013  | 274.8937086       | 181.3071201  | 1.516177128      |
| Scin      | 0.000472144 | 138.0230094       | 64.08993527  | 2.153583223      |
| Sema3b    | 4.13146E-08 | 174.5903557       | 88.50356538  | 1.972692908      |
| Sema3f    | 0.010716743 | 164.409966        | 96.88922031  | 1.696886046      |
| Sema7a    | 0.016571068 | 1148.933796       | 662.416769   | 1.734457595      |
| Serpinh1  | 5.88152E-06 | 6154.03173        | 3759.344109  | 1.636996123      |
| Sesn2     | 3.17435E-11 | 504.0652839       | 304.5833435  | 1.654933845      |
| Sfrp2     | 5.32173E-10 | 672.8783522       | 80.47886192  | 8.360932749      |
| Sh3bp4    | 0.004311567 | 285.1624164       | 173.8603082  | 1.640181243      |
| Sh3pxd2a  | 1.44329E-15 | 3711.006675       | 2257.788296  | 1.643646874      |
| Shank3    | 0.000354406 | 939.4009397       | 610.9590492  | 1.537584133      |
| Shox2     | 1.12777E-06 | 458.6127163       | 300.6316413  | 1.525497164      |
| Six1      | 0.001843386 | 289.2971822       | 187.4164638  | 1.543606022      |
| Ski       | 0           | 1991.920482       | 1325.501449  | 1.502767488      |
| Slc2a10   | 0.012287999 | 112.083273        | 72.504571    | 1.545878715      |
| Smad6     | 0.023452724 | 440.0226399       | 290.6890789  | 1.51372264       |
| Sox9      | 0           | 225.091792        | 86.65110704  | 2.597679357      |
| Spg20     | 0           | 591.3729946       | 367.5453285  | 1.60897976       |
| Stc1      | 0.01388323  | 49.21534908       | 28.84597849  | 1.706142473      |
| Stxbp1    | 2.22082E-08 | 349.6041417       | 231.5146366  | 1.510073604      |
| Sulf2     | 6.66134E-16 | 1851.047577       | 603.9169902  | 3.06506955       |
| Syt11     | 9.3794E-06  | 142.6130879       | 76.9130435   | 1.854211996      |
| Tbc1d30   | 0.025436087 | 52.54916987       | 33.39288283  | 1.57366377       |
| Tgfbr2    | 0.000119674 | 3471.362167       | 2059.616553  | 1.685440992      |
| Thy1      | 0.000140422 | 356.3723816       | 154.4107599  | 2.307950443      |
| Tjp1      | 0           | 1357.897962       | 747.1170037  | 1.817517143      |
| Tnfrsf11a | 0           | 743.0024051       | 308.82498    | 2.405901249      |

**Table S2**

| <b>Gene name</b> | <b>FDR</b>  | <b>Standard PRT mean</b> | <b>Control mean</b> | <b>Real Fold change</b> |
|------------------|-------------|--------------------------|---------------------|-------------------------|
| <b>Trpv4</b>     | 1.03251E-14 | 303.7763537              | 130.9907103         | 2.319067916             |
| <b>Twist1</b>    | 0.00626411  | 169.3717351              | 101.6817339         | 1.665704632             |
| <b>Wnt11</b>     | 0.037820874 | 30.69899852              | 17.20074609         | 1.784748078             |
| <b>Wnt5a</b>     | 0.002098827 | 171.7026126              | 100.1494942         | 1.714463103             |
| <b>Yap1</b>      | 7.02187E-09 | 661.3692888              | 399.1199173         | 1.657069117             |
| <b>Zfp365</b>    | 0           | 141.0036098              | 19.10649371         | 7.3798789               |
