# Supplementary material
Source: PubMed Central journal article supplement (PMC9397616)

Figure S5

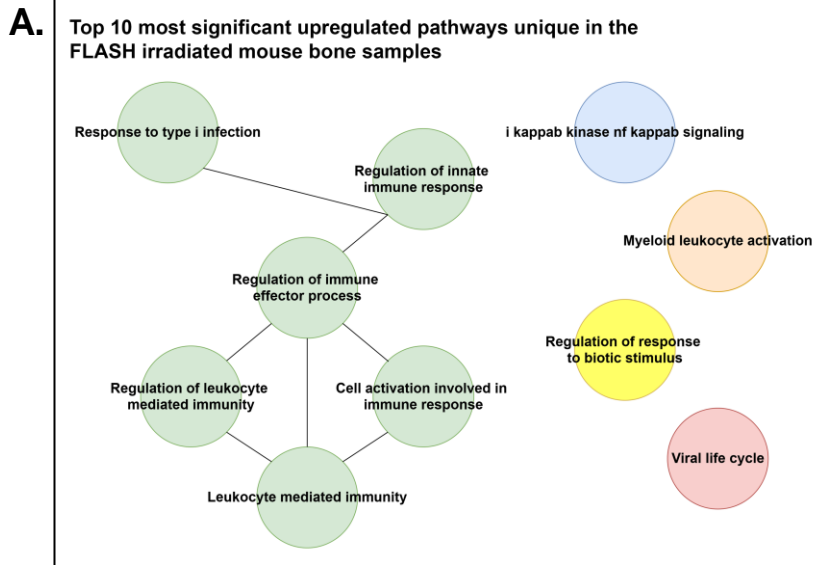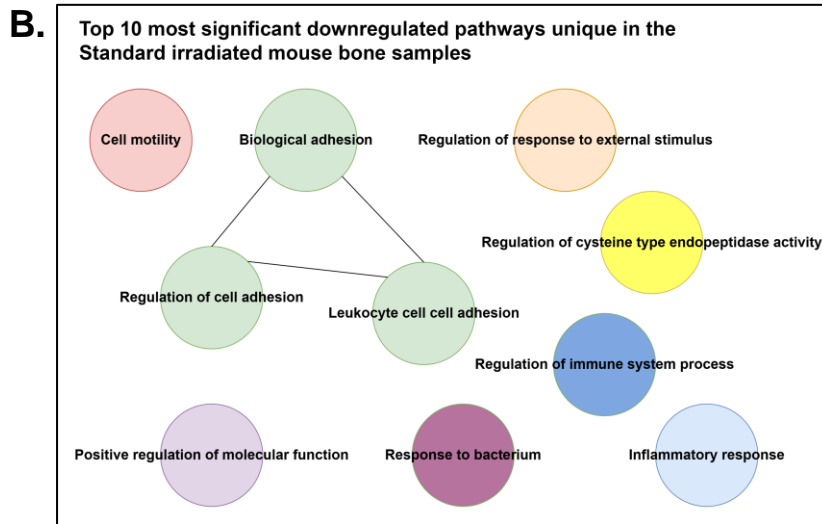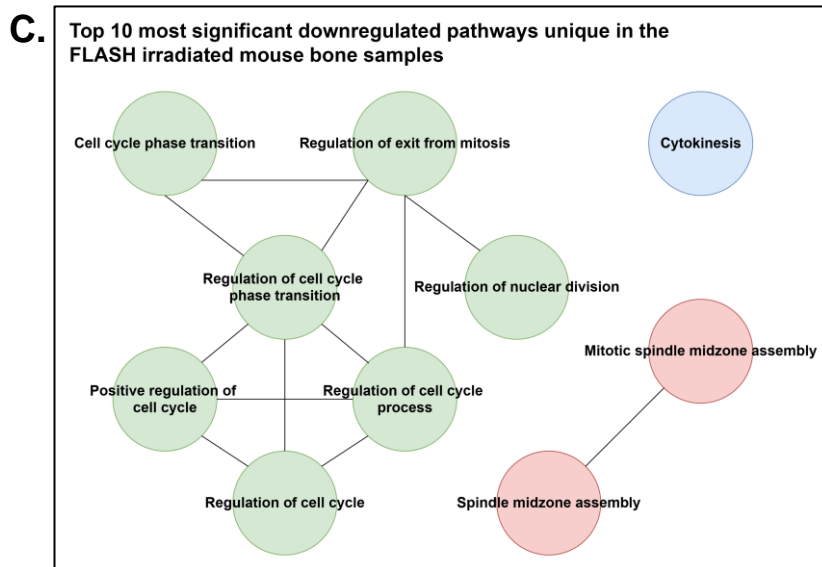

Supplement: can-21-1500_figure_s5_suppsf5.pdf [file can-21-1500_figure_s5_suppsf5.pdf]

Figure S1

A.

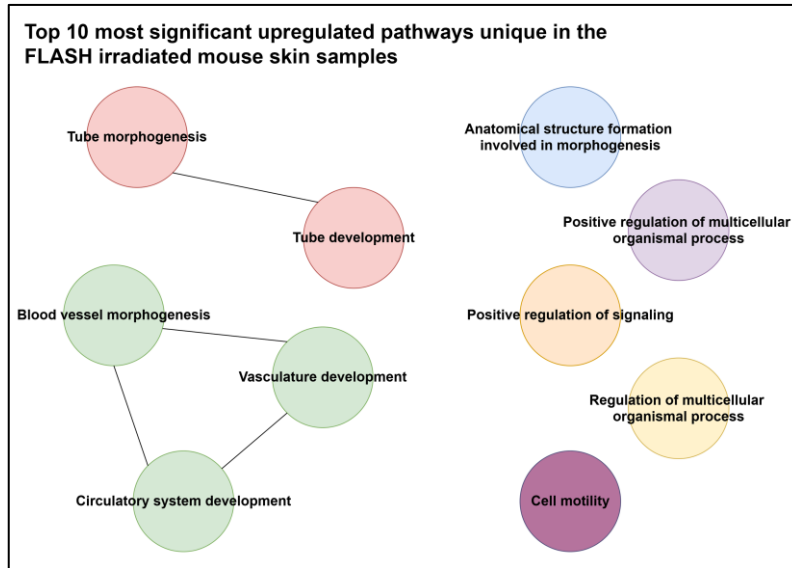

B.

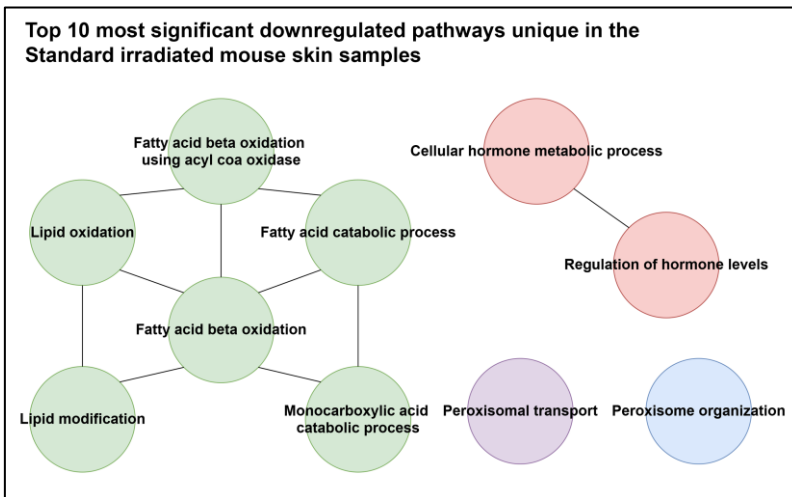

C.

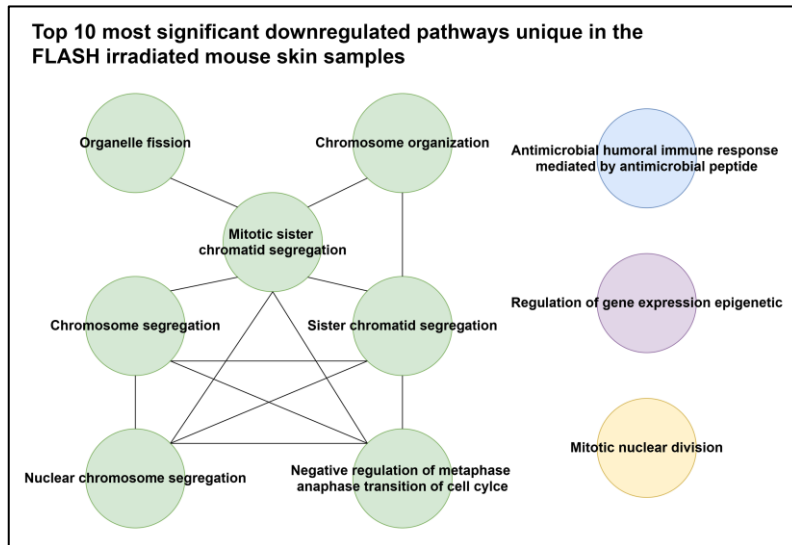

Supplement: can-21-1500_figure_sf1_suppsf1.pdf [file can-21-1500_figure_sf1_suppsf1.pdf]

Figure S2

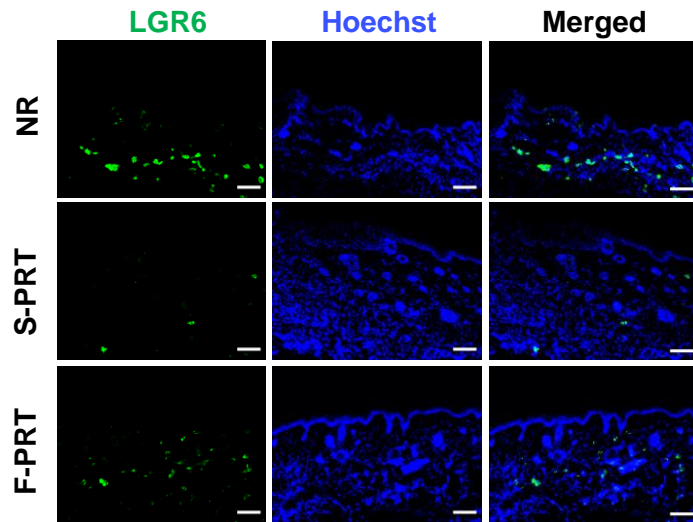

Supplement: can-21-1500_figure_sf2_suppsf2.pdf [file can-21-1500_figure_sf2_suppsf2.pdf]

**Figure S3**

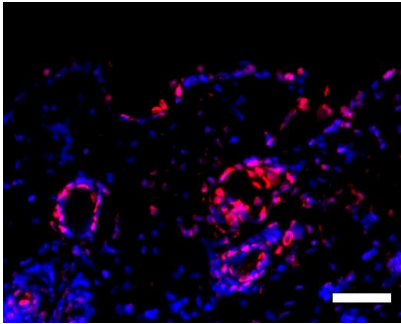

Supplement: can-21-1500_figure_sf3_suppsf3.pdf [file can-21-1500_figure_sf3_suppsf3.pdf]

Figure S4

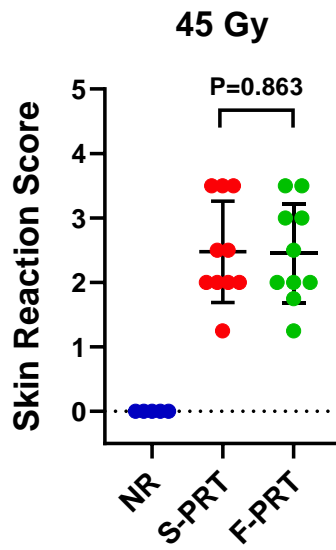

Supplement: can-21-1500_figure_sf4_suppsf4.pdf [file can-21-1500_figure_sf4_suppsf4.pdf]

Figure S6

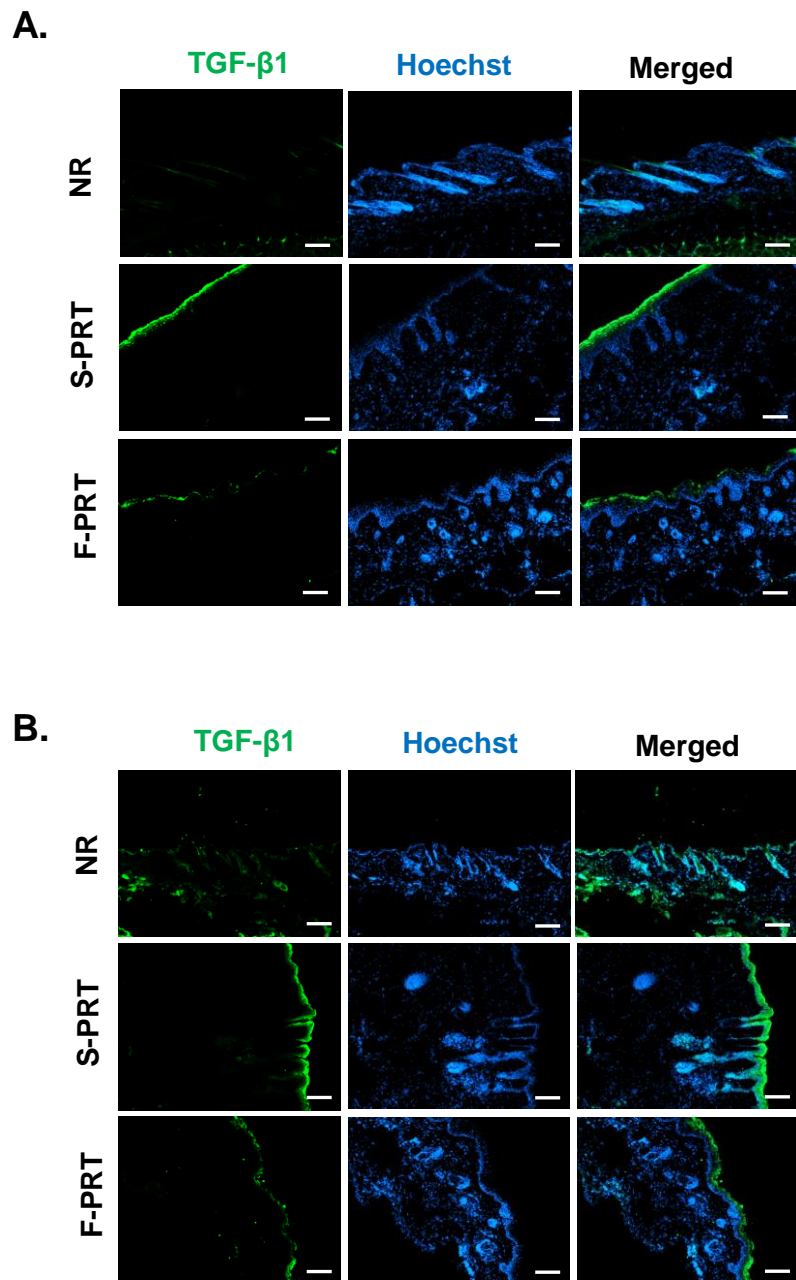

Supplement: can-21-1500_figure_sf6_suppsf6.pdf [file can-21-1500_figure_sf6_suppsf6.pdf]
